# Supplementary material for: Revisiting the hydrogenation behavior of NdGa and its hydride phases
Source: PubMed Central journal article supplement (PMC11001401; doi:10.1107/s1600576724000554), 2024-02-16
Supplement: j-57-00248-sup7.pdf [file j-57-00248-sup7.pdf]

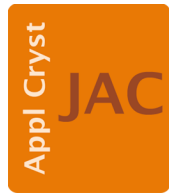

JOURNAL OF  
APPLIED  
CRYSTALLOGRAPHY

**Volume 57 (2024)**

**Supporting information for article:**

**Revisiting the hydrogenation behavior of NdGa and its hydride phases**

**Vitalii Shtender, Johan Cedervall, Gustav Ek, Claudia Zlotea, Mikael Andersson, Pascal Manuel, Martin Sahlberg and Ulrich Häussermann**

## Revisiting the hydrogenation behavior of NdGa and its hydride phases

Vitalii Shtender,<sup>1,\*</sup> Johan Cedervall,<sup>1</sup> Gustav Ek,<sup>1</sup> Claudia Zlotea,<sup>2</sup> Mikael S. Andersson,<sup>1</sup>  
Pascal Manuel,<sup>3</sup> Martin Sahlberg,<sup>1</sup> Ulrich Häussermann<sup>4</sup>

<sup>1</sup>Department of Chemistry – Ångström Laboratory, Uppsala University, Box 538, Uppsala  
751 21, Sweden

<sup>2</sup>Univ Paris Est Creteil, CNRS, ICMPE, UMR 7182, 2 rue Henri Dunant, 94320 Thiais,  
France

<sup>3</sup>ISIS Neutron and Muon Facility, Science and Technology Facilities Council, Rutherford  
Appleton Laboratory, Oxford OX11 0QX, UK

<sup>4</sup>Department of Materials and Environmental Chemistry, Stockholm University, 106 91  
Stockholm, Sweden

\*Corresponding author: [vitalii.shtender@angstrom.uu.se](mailto:vitalii.shtender@angstrom.uu.se)

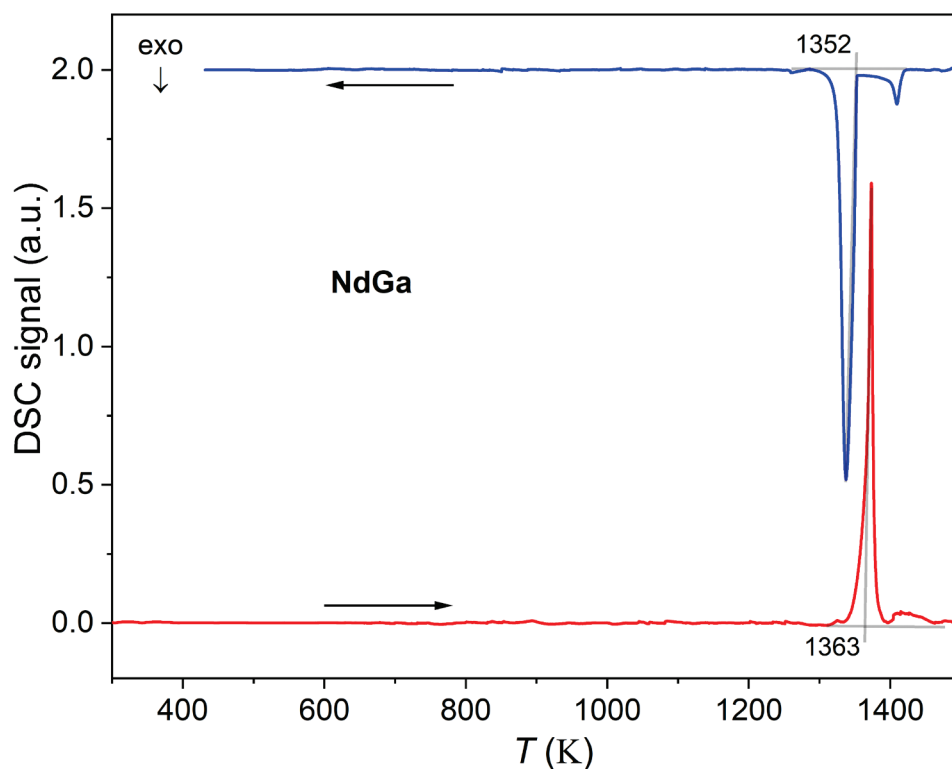

**Figure S1.** DSC spectrums for NdGa compounds with outlined onset temperatures.

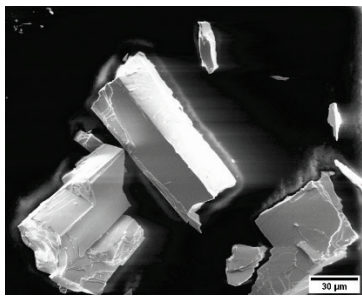

NdGa

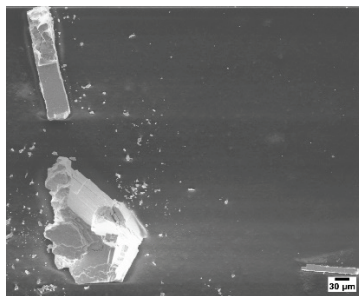

NdGaH<sub>0.9</sub>

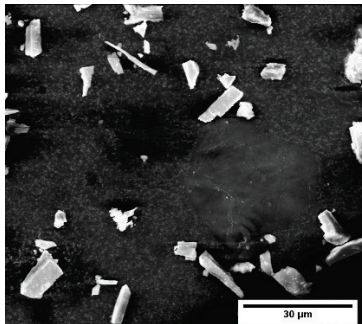

NdGaH<sub>1.2</sub>

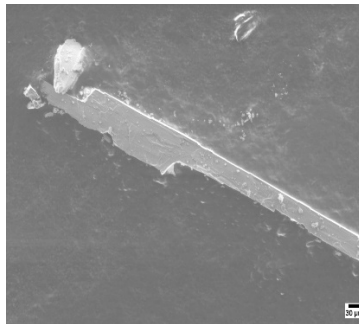

NdGaH<sub>1.6</sub>

**Figure S2.** SEM images for NdGaH<sub>x</sub> ( $x = 0, 0.9, 1.2$  and  $1.6$ ).

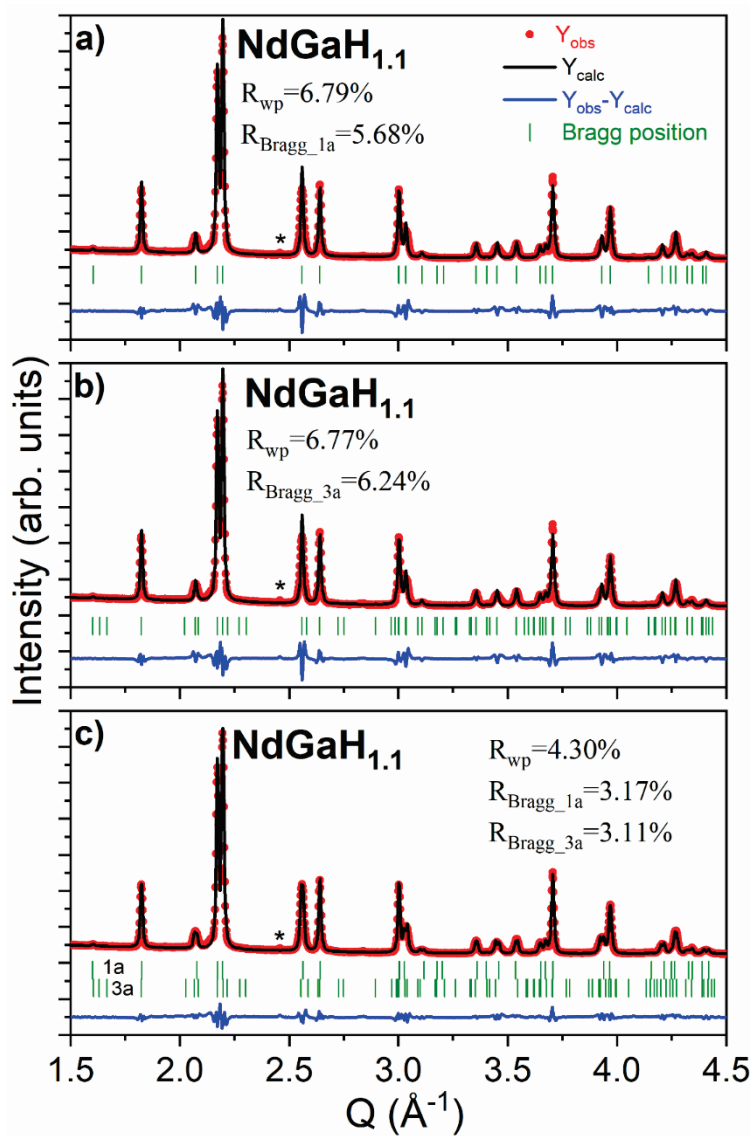

**Figure S3.** Rietveld refinement of  $\text{NdGaH}_{1.1}$  sample. a) fitting the  $1a$  CrB type structure b) fitting  $3a$ -superstructure, c) fitting as two-phase mixture. \* indicates the impurity of  $\text{TaGaO}_4$ .

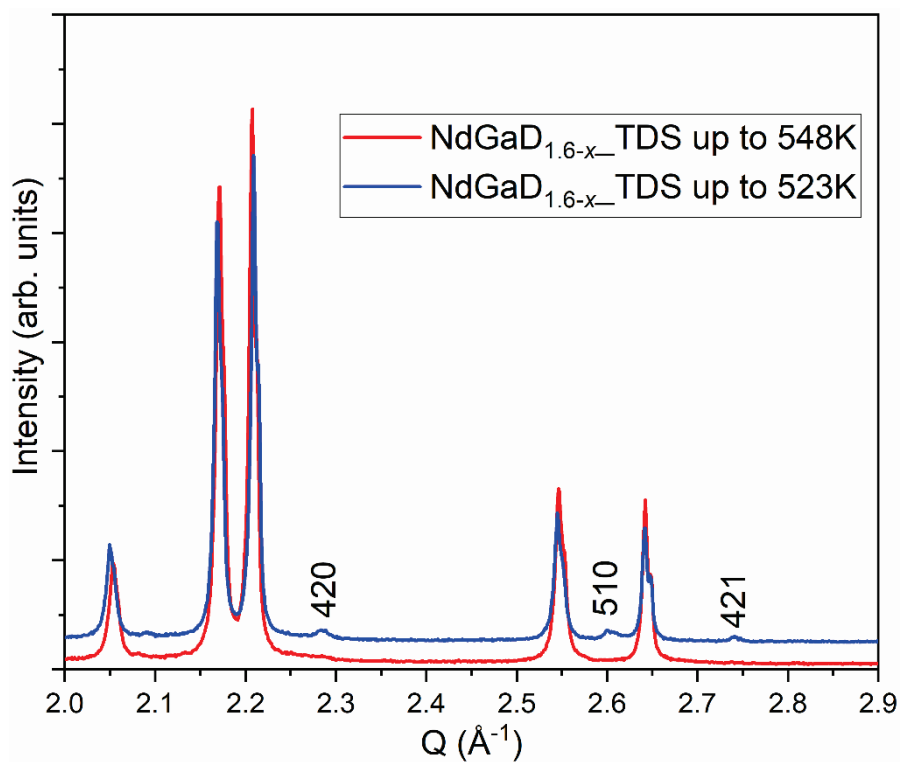

**Figure S4.** Comparison of two PXR D patterns of deuterides heated to 523 and 548 K. hkl's of superlattice peaks are presented.

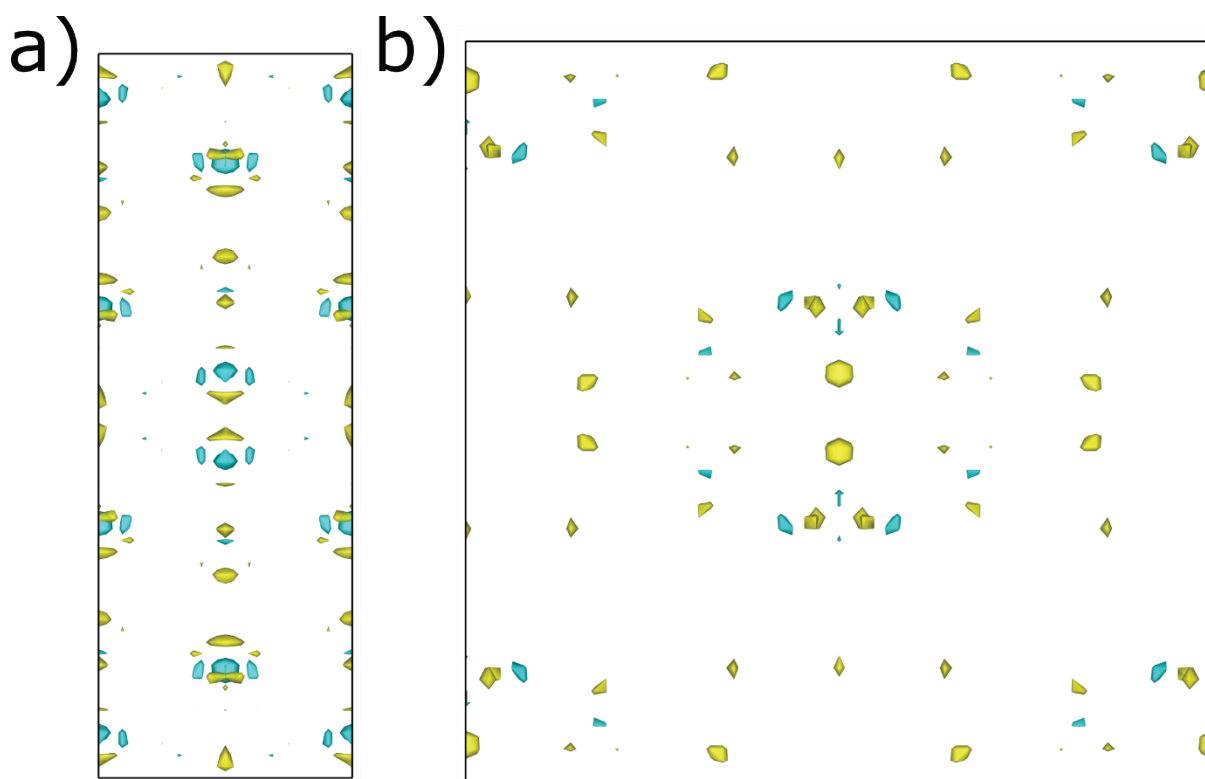

**Figure S5.** Fourier difference maps for a) NdGaD<sub>0.9</sub> and b) NdGaD<sub>1.6</sub>. Isosurface levels are set to 0.1 fm/Å<sup>3</sup>.
